# Supplementary material for: The use of synthetic agonists of quorum sensing N- acyl homoserine lactone pathway improves the bioleaching ability in Acidithiobacillus and Pseudomonas bacteria
Source: PeerJ. 2022 Aug 9;10:e13801. doi: 10.7717/peerj.13801 (PMC9373976; doi:10.7717/peerj.13801)
Supplement: Supplemental Information 1 [file peerj-10-13801-s001.xlsx]

## Sheet: Sheet1
	Fig 2A A. ferrivorans				Fig 2B A. ferroxidans
	Days incubation	Cu mg Mobilized	pH		Days incubation	Cu mg mobilized	pH
	0	0	1.5		0	0	1.5
	5	74	1.7		5	68	1.7
	10	117	1.8		10	133	1.8
	15	198	1.8		15	206	1.8
	20	217	1.7		20	201	1.9
	25	159	1.9		25	189	1.9
	28	162	1.8		28	191	1.8
	Fig 2C A. ferrivorans + A. ferroxidans				Fig 2D. Control
	Days incubation	Cu mg Mobilized	pH		Days incubation	Cu mg Mobilized	pH
	0	0	1.5		0	0	2.5
	5	97	1.6		5	0	3.8
	10	212	1.8		10	7	3.8
	15	221	1.6		15	12	3.6
	20	216	1.5		20	21	4.1
	25	166	1.5		25	20	4.2
	28	173	1.8		28	21	5
