# Supplementary material for: The use of synthetic agonists of quorum sensing N- acyl homoserine lactone pathway improves the bioleaching ability in Acidithiobacillus and Pseudomonas bacteria
Source: PeerJ. 2022 Aug 9;10:e13801. doi: 10.7717/peerj.13801 (PMC9373976; doi:10.7717/peerj.13801)
Supplement: Supplemental Information 2 [file peerj-10-13801-s002.xlsx]

## Sheet: Sheet1
	Fig. 3 Cu Bioleaching patterns differen PCB pulp densities at 20 days
	PCB density	A. ferroxidans	A. ferrivorans	A. ferroxidans +A. ferrivorans	Control
	0.5%	93	96	96	2
	0.01	91	95	96	3
	2.5%	59	62	69	5
	0.05	25	19	22	7
