# Supplementary material for: The use of synthetic agonists of quorum sensing N- acyl homoserine lactone pathway improves the bioleaching ability in Acidithiobacillus and Pseudomonas bacteria
Source: PeerJ. 2022 Aug 9;10:e13801. doi: 10.7717/peerj.13801 (PMC9373976; doi:10.7717/peerj.13801)
Supplement: Supplemental Information 3 [file peerj-10-13801-s003.xlsx]

## Sheet: Sheet1
	Panel A. N-dodecanoyl-DL-homoserine lactone (C16H29NO3						Panel A. N-dodecanoyl-DL-homoserine lactone (C16H29NO3
	Bioleaching agent	Ground PCB % W/V					Bioleaching agent	Ground PCB % W/V
		0.5%	0.01	2.5%	0.05			0.5%	0.01	2.5%	0.05
	A. ferroxidans	94	94	74	33		A. ferroxidans	89	91	51	28
	Control A. ferroxidans	91	90	59	25		Control A. ferroxidans	92	95	59	25
	A. ferrivorans	92	95	81	36		A. ferrivorans	76	88	63	22
	Control A. ferrivorans	88	92	62	19		Control A. ferrivorans	88	92	62	20
	A. ferroxidans +A. ferrivorans	98	98	78	41		A. ferroxidans +A. ferrivorans	85	91	52	17
	Control ferroxidans +A. ferrivorans	94	95	58	22		Control ferroxidans +A. ferrivorans	94	95	58	22
