# Supplementary material for: The use of synthetic agonists of quorum sensing N- acyl homoserine lactone pathway improves the bioleaching ability in Acidithiobacillus and Pseudomonas bacteria
Source: PeerJ. 2022 Aug 9;10:e13801. doi: 10.7717/peerj.13801 (PMC9373976; doi:10.7717/peerj.13801)
Supplement: Supplemental Information 4 [file peerj-10-13801-s004.xlsx]

## Sheet: Sheet1
	Fig. 5C 250 um				Fig. 5B 500 um				Fig. 5A 1000 um
		Absorbance	Bioleching CU			Absorbance	Bioleching CU			Absorbance	Bioleching CU
	A. ferrivorans	0.792	67		A. ferrivorans	0.652	56		A. ferrivorans	0.55	29
	Control A. ferrivorans	0.55	39		Control A. ferrivorans	0.49	33		Control A. ferrivorans	0.45	17
	A. Ferrooxidans	0.88	58		A. Ferrooxidans	0.68	44		A. Ferrooxidans	0.52	26
	Control A. Ferrooxidans	0.65	35		Control A. Ferrooxidans	0.57	29		Control A. Ferrooxidans	0.41	23
