# Supplementary material for: The use of synthetic agonists of quorum sensing N- acyl homoserine lactone pathway improves the bioleaching ability in Acidithiobacillus and Pseudomonas bacteria
Source: PeerJ. 2022 Aug 9;10:e13801. doi: 10.7717/peerj.13801 (PMC9373976; doi:10.7717/peerj.13801)
Supplement: Supplemental Information 5 [file peerj-10-13801-s005.xlsx]

## Sheet: Sheet1
	Bioleaching Agent	Au Bioleaching %
	P. Putida	45
	P. Putida + C14H25NO3 C16H27NO4	52
	P. fluorescens	31
	P. fluorescens + C14H25NO3 C16H27NO4	48
