# Supplementary material for: The use of synthetic agonists of quorum sensing N- acyl homoserine lactone pathway improves the bioleaching ability in Acidithiobacillus and Pseudomonas bacteria
Source: PeerJ. 2022 Aug 9;10:e13801. doi: 10.7717/peerj.13801 (PMC9373976; doi:10.7717/peerj.13801)
Supplement: Supplemental Information 6 [file peerj-10-13801-s006.xlsx]

## Sheet: Sheet1
		Cu Bioleaching assays by A. ferrivorans
		Assay 1				Assay 2					Assay 2					Figure 2
	Days incubation	Cu M S1	Cu M S2	Cu M S3		Days incubation	Cu M S1	Cu M S2	Cu M S3		Days incubation	Cu M S1	Cu M S2	Cu M S3
	0	0	0	0		0	0	0	0		0	0	0	0
	5	77	72	73		5	67	76	73		5	77	72	73
	10	120	121	112		10	120	119	114		10	120	121	112
	15	180	201	212		15	183	195	201		15	180	201	212
	20	215	214	222		20	221	196	203		20	215	214	222
	25	160	158	158		25	153	155	161		25	160	158	158
	28	159	164	161		28	154	160	169		28	159	164	161
		Cu Bioleaching assays by A. ferroxidans
		Assay 1				Assay 2					Assay 2
	Days incubation	Cu M S1	Cu M S2	Cu M S3		Days incubation	Cu M S1	Cu M S2	Cu M S3		Days incubation	Cu M S1	Cu M S2	Cu M S3
	0	0	0	0		0	0	0	0		0	0	0	0
	5	70	66	68		5	73	72	70		5	74	67	72
	10	142	130	126		10	136	135	141		10	140	133	139
	15	202	210	206		15	199	198	204		15	205	198	198
	20	209	198	206		20	202	207	203		20	211	209	202
	25	178	186	198		25	180	186	184		25	177	186	178
	28	190	194	191		28	196	191	202		28	201	204	193
		Cu Bioleaching assays by A. ferroxidans + A. ferrivorans
		Assay 1				Assay 2					Assay 2
	Days incubation	Cu M S1	Cu M S2	Cu M S3		Days incubation	Cu M S1	Cu M S2	Cu M S3		Days incubation	Cu M S1	Cu M S2	Cu M S3
	0	0	0	0		0	0	0	0		0	0	0	0
	5	99	96	95		5	103	98	100		5	99	102	102
	10	208	212	217		10	211	209	203		10	203	219	199
	15	221	218	225		15	216	222	218		15	209	214	213
	20	220	215	209		20	223	216	220		20	119	216	214
	25	159	173	168		25	165	154	162		25	163	167	160
	28	172	175	173		28	169	176	170		28	160	172	164
		Cu Bioleaching assays Control
		Assay 1				Assay 2					Assay 2
	Days incubation	Cu M S1	Cu M S2	Cu M S3		Days incubation	Cu M S1	Cu M S2	Cu M S3		Days incubation	Cu M S1	Cu M S2	Cu M S3
	0	0	0	0		0	0	0	0		0	0	0	0
	5	0	0	0		5	0	0	0		5	0	0	0
	10	5	7	8		10	3	3	4		10	0	4	6
	15	12	13	12		15	13	11	15		15	10	9	16
	20	20	20	22		20	19	23	17		20	22	19	23
	25	19	22	21		25	22	20	22		25	19	24	24
	28	20	22	20		28	17	18	23		28	23	25	22
																Figure 3
	PCB density	A. ferroxidans S1	A. ferroxidans S2	A. ferroxidans S3	A. ferrivorans s1	A. ferrivorans s2	A. ferrivorans S3	A. ferroxidans +A. ferrivorans S1	A. ferroxidans +A. ferrivorans S2	A. ferroxidans +A. ferrivorans S3	Control S1	Control 21	Control S3
	0.5%	91	94	96	97	96	96	95	94	96	2	2	2
	0.01	92	93	90	92	98	96	94	96	96	3	4	2
	2.5%	61	59	58	61	62	61	68	70	69	4	5	5
	0.05	23	26	26	20	18	20	21	20	23	8	6	7
	Sample 1 N-dodecanoyl-DL-homoserine lactone (C16H29NO3						Sample 2 N-dodecanoyl-DL-homoserine lactone (C16H29NO3							Sample 3 N-dodecanoyl-DL-homoserine lactone (C16H29NO3							Figure 4
	Bioleaching agent	Ground PCB % W/V						Bioleaching agent	Ground PCB % W/V					Bioleaching agent	Ground PCB % W/V
		0.5%	0.01	2.5%	0.05				0.5%	0.01	2.5%	0.05			0.5%	0.01	2.5%	0.05
	A. ferroxidans	91	92	76	32			A. ferroxidans	95	93	72	35		A. ferroxidans	92	90	76	32
	Control A. ferroxidans	93	89	59	27			Control A. ferroxidans	89	92	61	22		Control A. ferroxidans	90	93	57	28
	A. ferrivorans	91	93	80	38			A. ferrivorans	93	90	82	33		A. ferrivorans	90	96	80	37
	Control A. ferrivorans	89	90	63	18			Control A. ferrivorans	85	93	59	21		Control A. ferrivorans	87	92	63	19
	A. ferroxidans +A. ferrivorans	97	99	76	44			A. ferroxidans +A. ferrivorans	94	96	80	39		A. ferroxidans +A. ferrivorans	98	97	74	46
	Control ferroxidans +A. ferrivorans	95	95	57	21			Control ferroxidans +A. ferrivorans	92	91	57	22		Control ferroxidans +A. ferrivorans	93	96	57	20
	Sample 1 N-(3-Hydroxytetradecanoyl)-DL-homoserine lactone (C18 H33NO4)						Sample 2 N-(3-Hydroxytetradecanoyl)-DL-homoserine lactone (C18 H33NO4)							Sample 3 N-(3-Hydroxytetradecanoyl)-DL-homoserine lactone (C18 H33NO4)
	Bioleaching agent	Ground PCB % W/V					Bioleaching agent	Ground PCB % W/V						Bioleaching agent	Ground PCB % W/V
		0.5%	0.01	2.5%	0.05			0.5%	0.01	2.5%	0.05				0.5%	0.01	2.5%	0.05
	A. ferroxidans	91	90	50	28		A. ferroxidans	88	91	53	27			A. ferroxidans	92	90	49	29
	Control A. ferroxidans	93	94	57	26		Control A. ferroxidans	90	96	60	27			Control A. ferroxidans	92	95	59	25
	A. ferrivorans	73	89	64	25		A. ferrivorans	78	87	62	23			A. ferrivorans	75	86	64	21
	Control A. ferrivorans	86	93	63	29		Control A. ferrivorans	90	92	60	21			Control A. ferrivorans	88	92	62	20
	A. ferroxidans +A. ferrivorans	85	92	63	22		A. ferroxidans +A. ferrivorans	84	91	50	14			A. ferroxidans +A. ferrivorans	85	91	52	17
	Control ferroxidans +A. ferrivorans	95	91	62	15		Control ferroxidans +A. ferrivorans	91	92	59	20			Control ferroxidans +A. ferrivorans	93	95	56	24
		PCB size 250 um								PCB size 500 um								PCB size 1000 um							Fig. 5
		Absorbance S1	Bioleching CU S1	Absorbance S2	Bioleching CU S2	Absorbance S3	Bioleching CU S3			Absorbance S1	Bioleching CU S1	Absorbance S2	Bioleching CU S2	Absorbance S3	Bioleching CU S3			Absorbance S1	Bioleching CU S1	Absorbance S2	Bioleching CU S2	Absorbance S3	Bioleching CU S3
	A. ferrivorans	0.768	66	0.801	67	0.789	68		A. ferrivorans	0.661	57	0.643	55	0.649	56		A. ferrivorans	0.49	30	0.61	25	0.52	33
	Control A. ferrivorans	0.5	40	0.53	35	0.59	41		Control A. ferrivorans	0.495	35	0.52	32	0.489	33		Control A. ferrivorans	0.46	17	0.5	19	0.61	18
	A. Ferrooxidans	0.91	55	0.86	62	0.91	57		A. Ferrooxidans	0.64	44	0.71	42	0.71	43		A. Ferrooxidans	0.54	25	0.6	29	0.48	25
	Control A. Ferrooxidans	0.64	36	0.67	35	0.64	36		Control A. Ferrooxidans	0.54	28	0.61	31	0.55	30		Control A. Ferrooxidans	0.39	20	0.39	18	0.44	26
																Figure 6
	Assay 1					Assay 2					Assay 3
	Bioleaching Agent	Au Bioleaching % S1	Au Bioleaching % S2	Au Bioleaching % S3		Bioleaching Agent	Au Bioleaching % S1	Au Bioleaching % S2	Au Bioleaching % S3		Bioleaching Agent	Au Bioleaching % S1	Au Bioleaching % S2	Au Bioleaching % S3
	P. Putida	45	46	42		P. Putida	45	46	42		P. Putida	47	45	43
	P. Putida + C14H25NO3 C16H27NO4	51	50	55		P. Putida + C14H25NO3 C16H27NO4	51	50	55		P. Putida + C14H25NO3 C16H27NO4	52	49	50
	P. fluorescens	33	30	29		P. fluorescens	33	30	29		P. fluorescens	35	32	28
	P. fluorescens + C14H25NO3 C16H27NO4	47	49	49		P. fluorescens + C14H25NO3 C16H27NO4	47	49	49		P. fluorescens + C14H25NO3 C16H27NO4	47	49	46
